# Supplementary material for: Citrus flavanone metabolites protect pancreatic-β cells under oxidative stress induced by cholesterol
Source: Royal Society of Chemistry journal article supplement (doi:10.1039/d0fo01839b), 2020-01-01
Supplement: d0fo01839b1.pdf [file d0fo01839b1.pdf]

## Supplementary material

### Citrus flavanone metabolites protect pancreatic- $\beta$ cells under oxidative stress induced by cholesterol

Sara L. Anacleto<sup>a,b</sup>, Dragan Milenkovic<sup>c,d</sup>, Paul A. Kroon<sup>e</sup>, Paul W. Needs<sup>e</sup>, Franco Maria Lajolo<sup>a,b</sup>  
and Neuza M. A. Hassimotto<sup>a,b</sup>

<sup>a</sup>Department of Food Science and Nutrition, School of Pharmaceutical Science, University of São Paulo, Av. Prof Lineu Prestes 580, Bloco 14, 05508-900 São Paulo, SP, Brazil.

<sup>b</sup>Food Research Center-(FoRC-CEPID), University of São Paulo, Av. Prof Lineu Prestes 580, Bloco 14, 05508-900, São Paulo, SP, Brazil.

<sup>c</sup>Department of Internal Medicine, Division of Cardiovascular Medicine, University of California, 451 East Health Sciences Drive, 95616, Davis, California, USA.

<sup>d</sup>Unité de Nutrition Humaine, INRA, UMR 1019, UNH, CRNH Auvergne, Clermont-Ferrand, Clermont Université, Université d'Auvergne, Clermont-Ferrand, France.

<sup>e</sup>Quadram Institute Bioscience, Norwich Research Park, Norwich, UK.

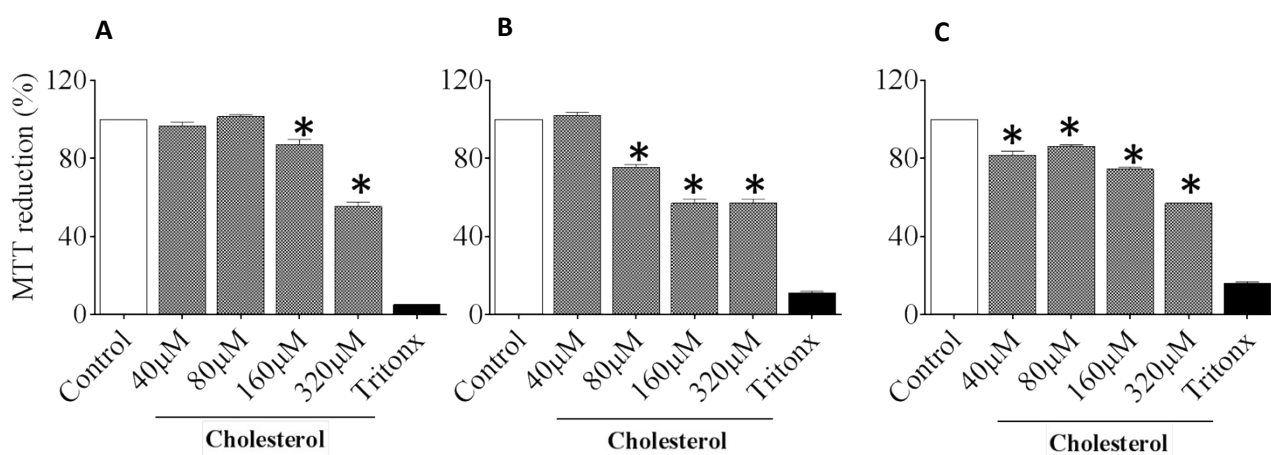

#### Figure S1

Effects of cholesterol on viability of Min6 cells. Cell viability was assessed by MTT assay. (A) 6 h incubation, (B) 12 h incubation, (C) 24 h incubation. \* $p < 0.05$  vs. control ( $n = 4$  biological replicate).

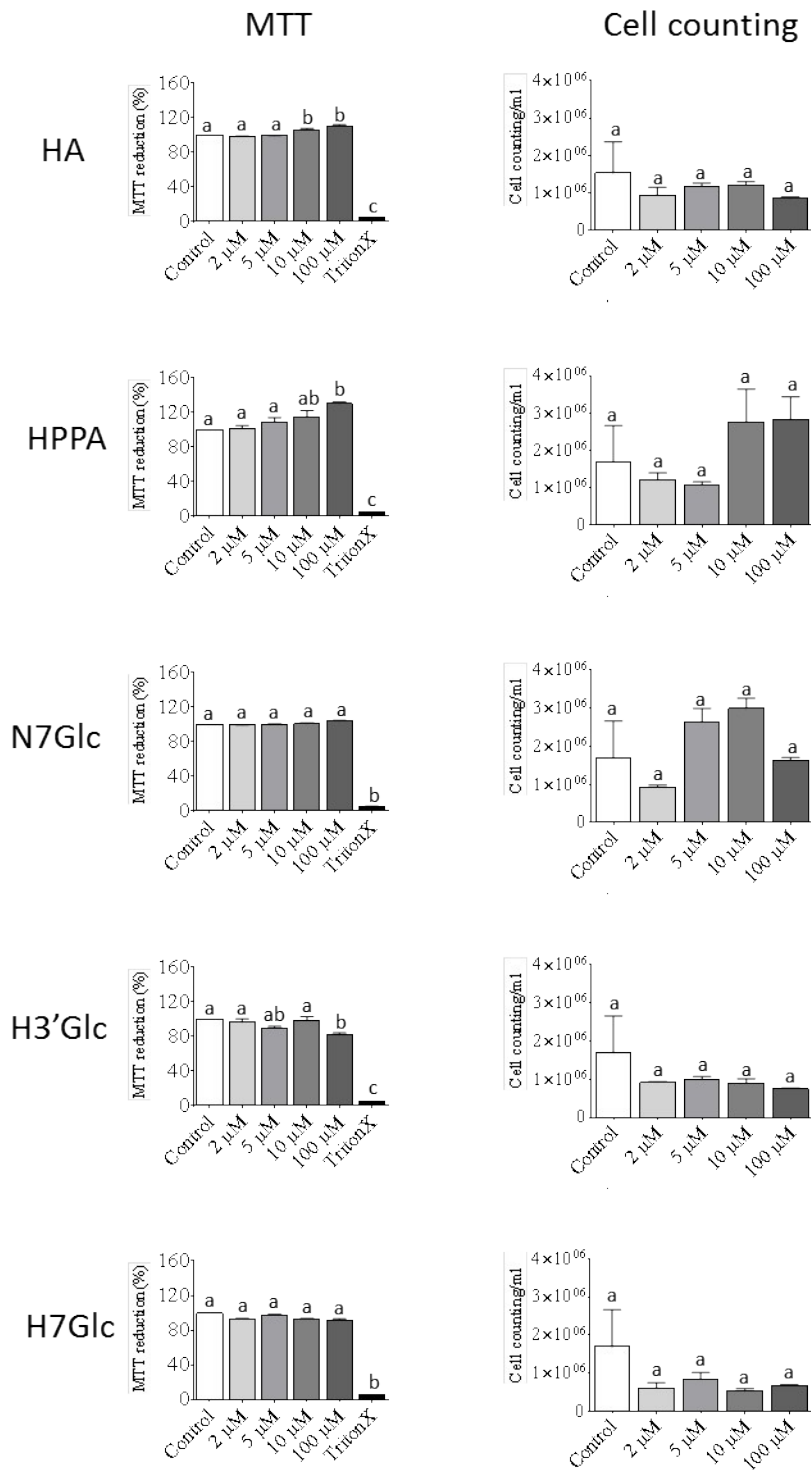

**Figure S2**

Effect of phenolic acids and flavanone metabolites on viability of Min6 cells and cell counting in 6 h incubation. Hippuric acid (HA), 3-(4-hydroxyphenyl)propionic acid (HPPA), naringenin 7-glucuronide (N7Glc), hesperitin 3'-glucuronide (H3'Glc) and hesperitin 7-glucuronide (H7Glc). Cell viability was analyzed by MTT. Cell counting was analyzed using TC20™ Automated cell counter (Bio-Rad) considering only live cells count. The changes in MTT reduction were expressed as percentage of the value of control cells. Values bearing different superscript letters were significantly different ( $p < 0.05$ ). ( $n = 3$  biological replicate).
